# Supplementary material for: Spatially explicit assessment of water scarcity and potential mitigating solutions in a large water-limited basin: the Yellow River basin in China
Source: Copernicus journal article supplement (doi:10.5194/hess-2024-88), 2024-05-07
Supplement: Supplementary file 1 [file hess-2024-88-supplement.pdf]

Supplementary material

**Spatially explicit assessment of water scarcity and potential mitigating solutions in a large water-limited basin: the Yellow River basin in China**

**Weibin Zhang<sup>1,2</sup>, Xining Zhao<sup>3,4</sup>, Xuerui Gao<sup>4</sup>, Wei Liang<sup>5</sup>, Junyi Li<sup>5</sup>, and Baoqing Zhang<sup>6\*</sup>**

<sup>1</sup>College of Water Resources and Architectural Engineering, Northwest A&F University, 712100 Yangling, Shaanxi Province, China.

<sup>2</sup>Key Laboratory of Agricultural Soil and Water Engineering in Arid and Semiarid Areas, Ministry of Education, Northwest A&F University, 712100 Yangling, Shaanxi Province, China.

<sup>3</sup>Institute of Soil and Water Conservation, Northwest A&F University, 712100 Yangling, Shaanxi Province, China.

<sup>4</sup>Institute of Soil and Water Conservation, Chinese Academy of Sciences and Ministry of Water Resources, 712100 Yangling, Shaanxi Province, China.

<sup>5</sup>School of Geography and Tourism, Shaanxi Normal University, 710119 Xi'an, Shaanxi Province, China.

<sup>6</sup>Key Laboratory of Western China's Environmental Systems (Ministry of Education), College of Earth and Environmental Sciences, Lanzhou University, 730000 Lanzhou, Gansu Province, China.

**\*Corresponding author:**

Email: baoqzhang@lzu.edu.cn;

Tel (Fax): +86 (931) 8912404;

Address: NO. 222 Tianshui Road (South), Chengguan District, Lanzhou, Gansu Province, China

**Contents of this file**

Figures S1 to S8

Tables S1 to S2

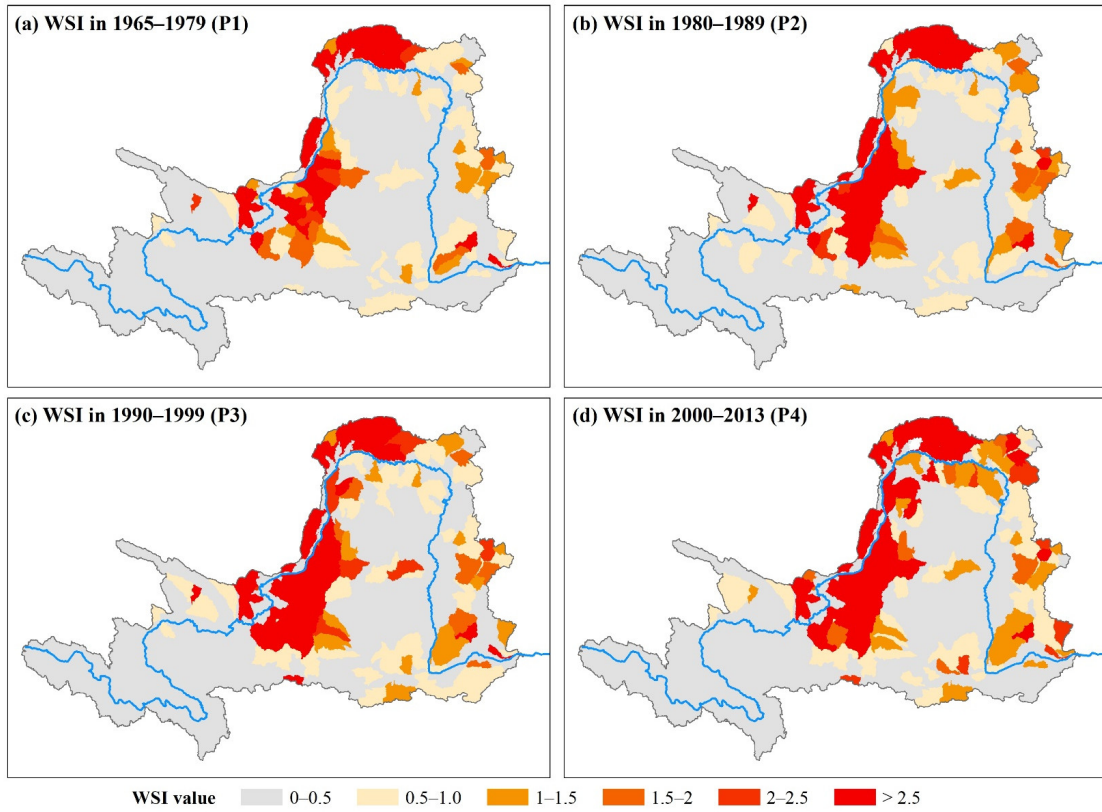

**Figure S1.** Spatial distribution of water scarcity index (WSI) value in different periods.

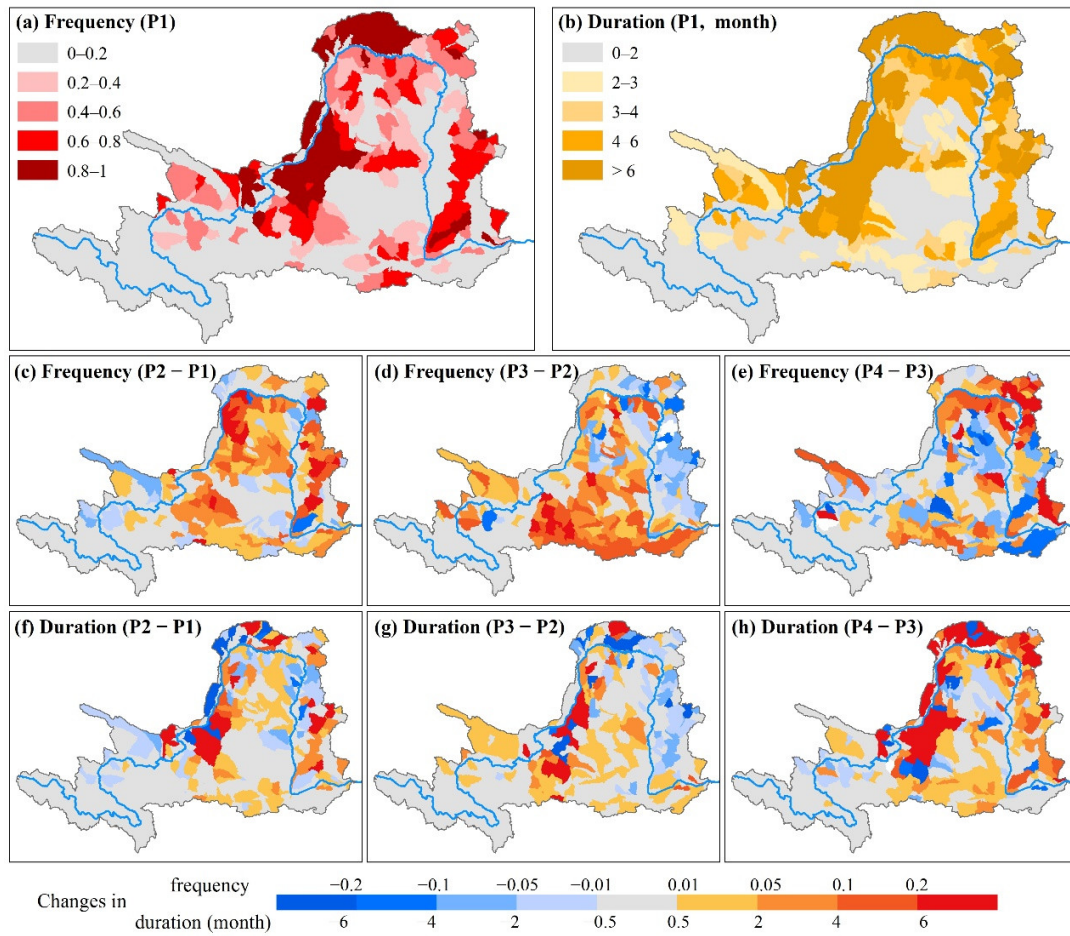

**Figure S2.** Spatial distribution of (a) frequency and (b) average duration (month) of water scarcity during P1. Changes in (c, d, and e) frequency and (f, g, and h) average duration of water scarcity between two consecutive decades.

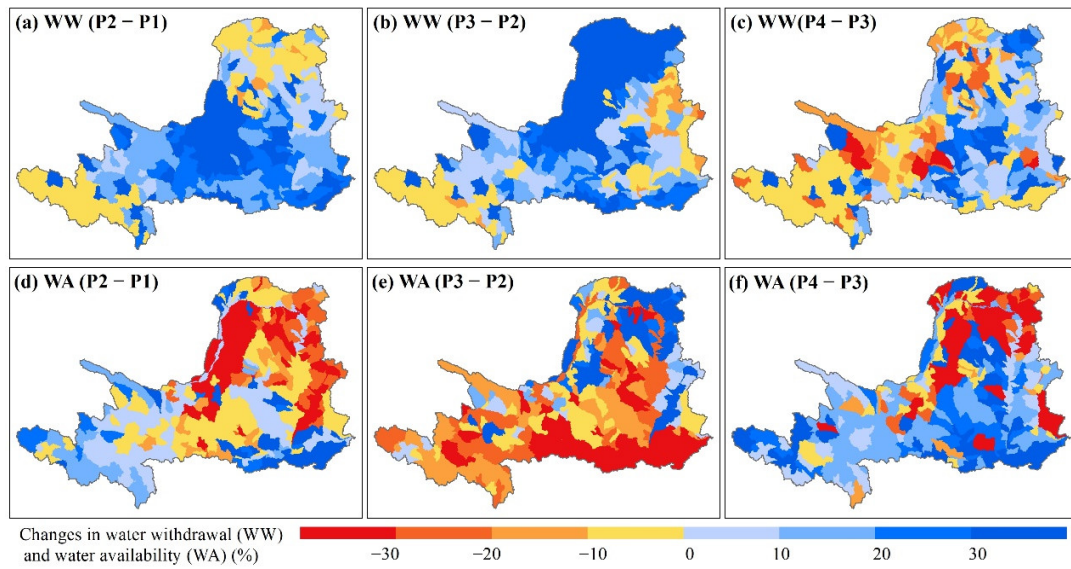

**Figure S3.** Relative changes (%) in water withdrawal (a, b, and c) and water availability (d, e, and f) between the consecutive periods. WW and WA denote the water withdrawal and water availability, respectively.

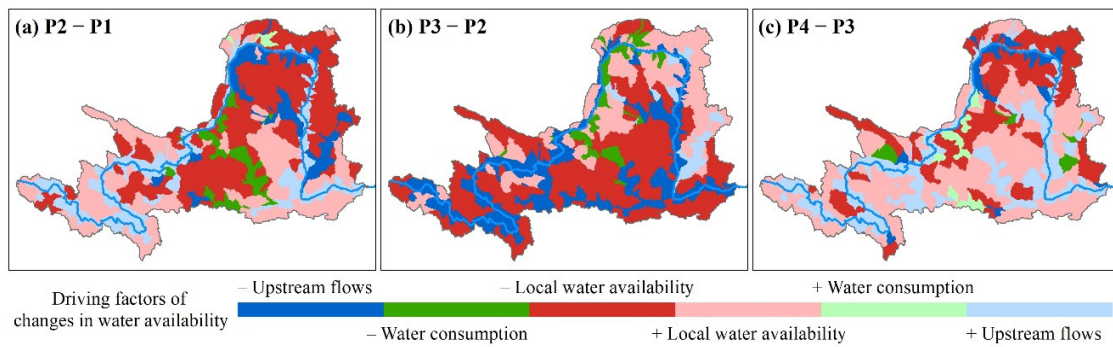

**Figure S4.** Spatial pattern of driving factors of changes in water availability between two consecutive periods. A '+' prefix indicates a positive effect on water availability, whereas a '-' indicates a negative effect.

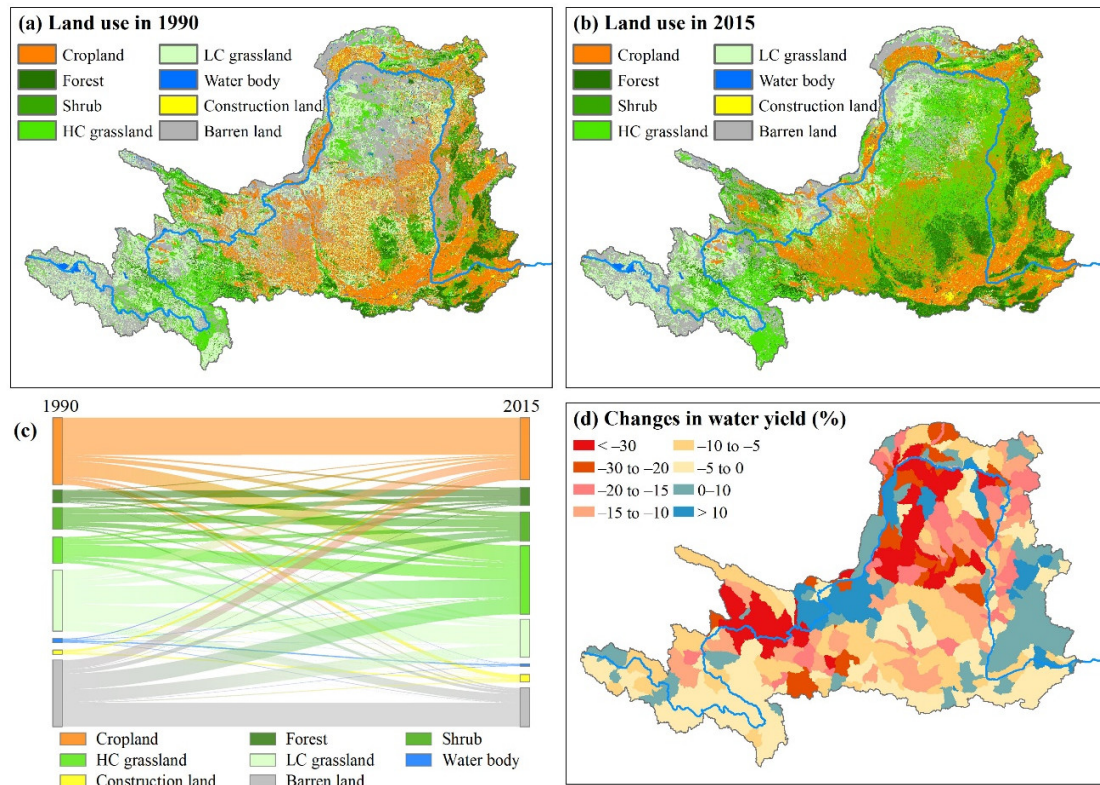

45

**Figure S5.** (a) Land use in 1990. (b) Land use in 2015. (c) Transition of land use between 1990 and 2015. (d) Changes in water yield with and without vegetation restoration (i.e., land use in 1990). HC grassland: high coverage grassland; LC: low coverage grassland.

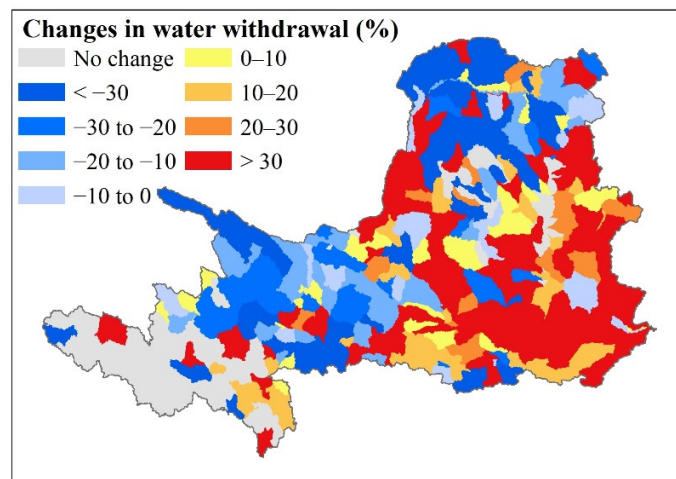

**Figure S6.** Spatial pattern of changes in total water withdrawal from the recent decade (2000–2013) to the 2030s, expressed as a percentage (%).



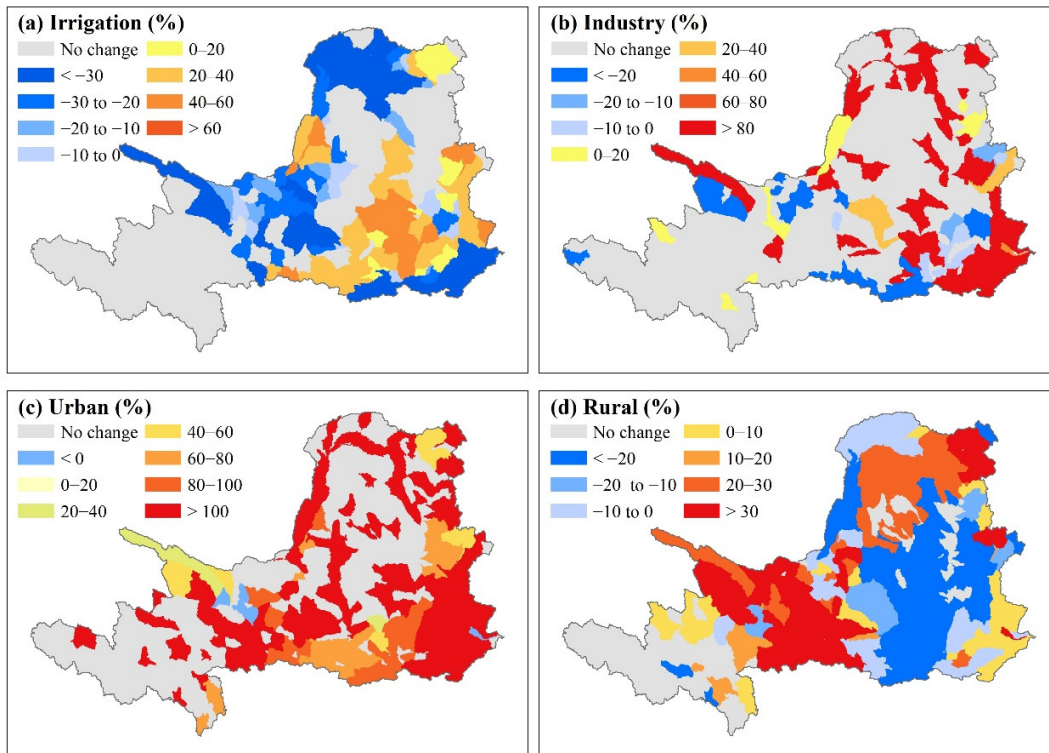

**Figure S7.** Same as Figure S6, but for different sectors.

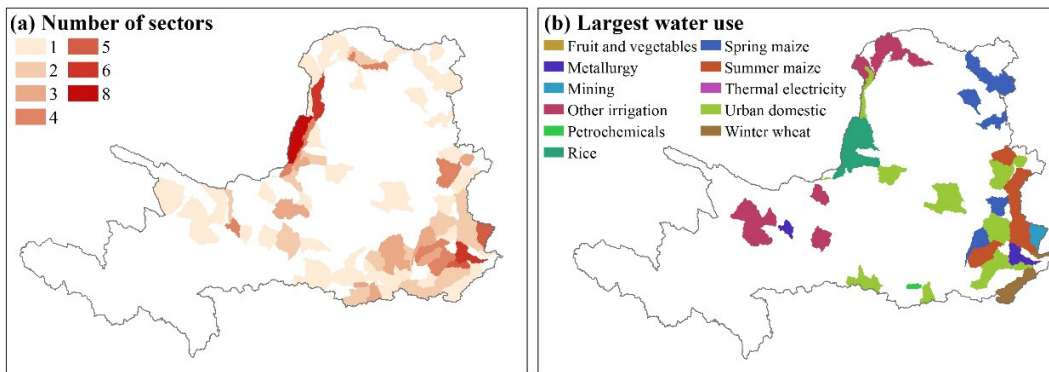

55

**Figure S8.** Spatial distribution of (a) number of sectors for the top 5% water use sub-basin sector combinations and (b) its largest sector.

60 **Table S1.** Definitions of different types of the population exposed to water scarcity between two periods (WSII: WSI value in the latter period, and WSIf: WSI value in the former period).

| <b>WSI condition</b>              | <b>Classification</b>         |
|-----------------------------------|-------------------------------|
| WSII >1 and WSIf <1               | Moving into water scarcity    |
| WSII <1 and WSIf >1               | Moving out of water scarcity  |
| WSII >1, WSIf >1, and WSII > WSIf | Aggravation of water scarcity |
| WSII >1, WSIf >1, and WSII < WSIf | Alleviation of water scarcity |

**Table S2.** Irrigation efficiency (IE) improvement (Zhao et al., 2015).

| <b>Provinces</b> | <b>IE in 2007</b> | <b>IE in 2030</b> | <b>Increase rate (%)</b> |
|------------------|-------------------|-------------------|--------------------------|
| Qinghai          | 0.43              | 0.67              | 53                       |
| Sichuan          | 0.40              | 0.54              | 37                       |
| Gansu            | 0.49              | 0.68              | 39                       |
| Ningxia          | 0.41              | 0.57              | 39                       |
| Inner Mongolia   | 0.44              | 0.70              | 59                       |
| Shaanxi          | 0.52              | 0.68              | 32                       |
| Shanxi           | 0.49              | 0.61              | 27                       |
| Henan            | 0.55              | 0.68              | 22                       |
